# Supplementary material for: In vivo imaging of hydrogen peroxide with chemiluminescent nanoparticles
Source: Springer Nature journal article supplement (doi:10.1038/nmat1983), 2007-08-19
Supplement: 41563_2007_BFnmat1983_MOESM5_ESM.pdf [file 41563_2007_BFnmat1983_MOESM5_ESM.pdf]

## Supplementary information

### *In vivo* imaging of hydrogen peroxide with chemiluminescent nanoparticles

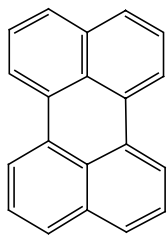

Perylene

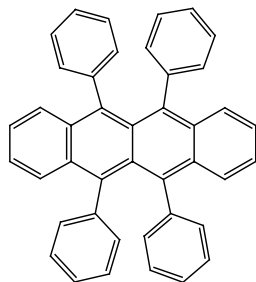

Rubrene

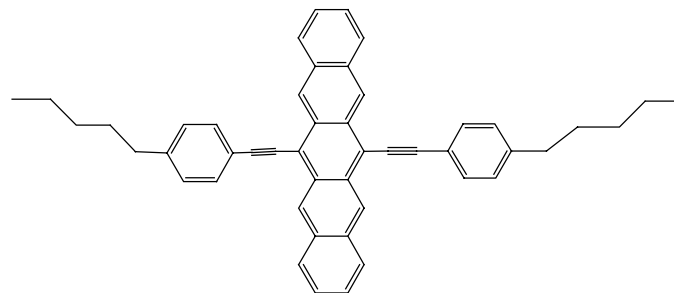

6,13-bis (4-pentylphenylethynyl) perylene

Figure 1S. Chemical structure of fluorescent dyes used in peroxalate nanoparticles

**Table 1S. Properties of peroxalate polymers**

| No. | Polymer | Monomers | Comments                            |
|-----|---------|----------|-------------------------------------|
| 1   |         |          | Used in this work                   |
| 2   |         |          | Low reactivity to hydrogen peroxide |
| 3   |         |          | Poor stability in water             |
| 4   |         |          | Poor stability in water             |
| 5   |         |          | No polymerization                   |

**Comment on Table 1S.**

Peroxalate polymers **2**, **3**, **4** and **5** were synthesized according to the procedure developed for the synthesis of polymer **1**, their chemical structures are shown in Table 1S. Polymers **2**, **3**, **4**, **5** were formulated with rubrene and their chemiluminescence intensity was evaluated in the presence of hydrogen peroxide. Nanoparticles formulated from polymers **2**, **3**, and **4** had a low chemiluminescence intensity in the presence of hydrogen peroxide. Therefore, polymer **1** was chosen for the imaging experiments.

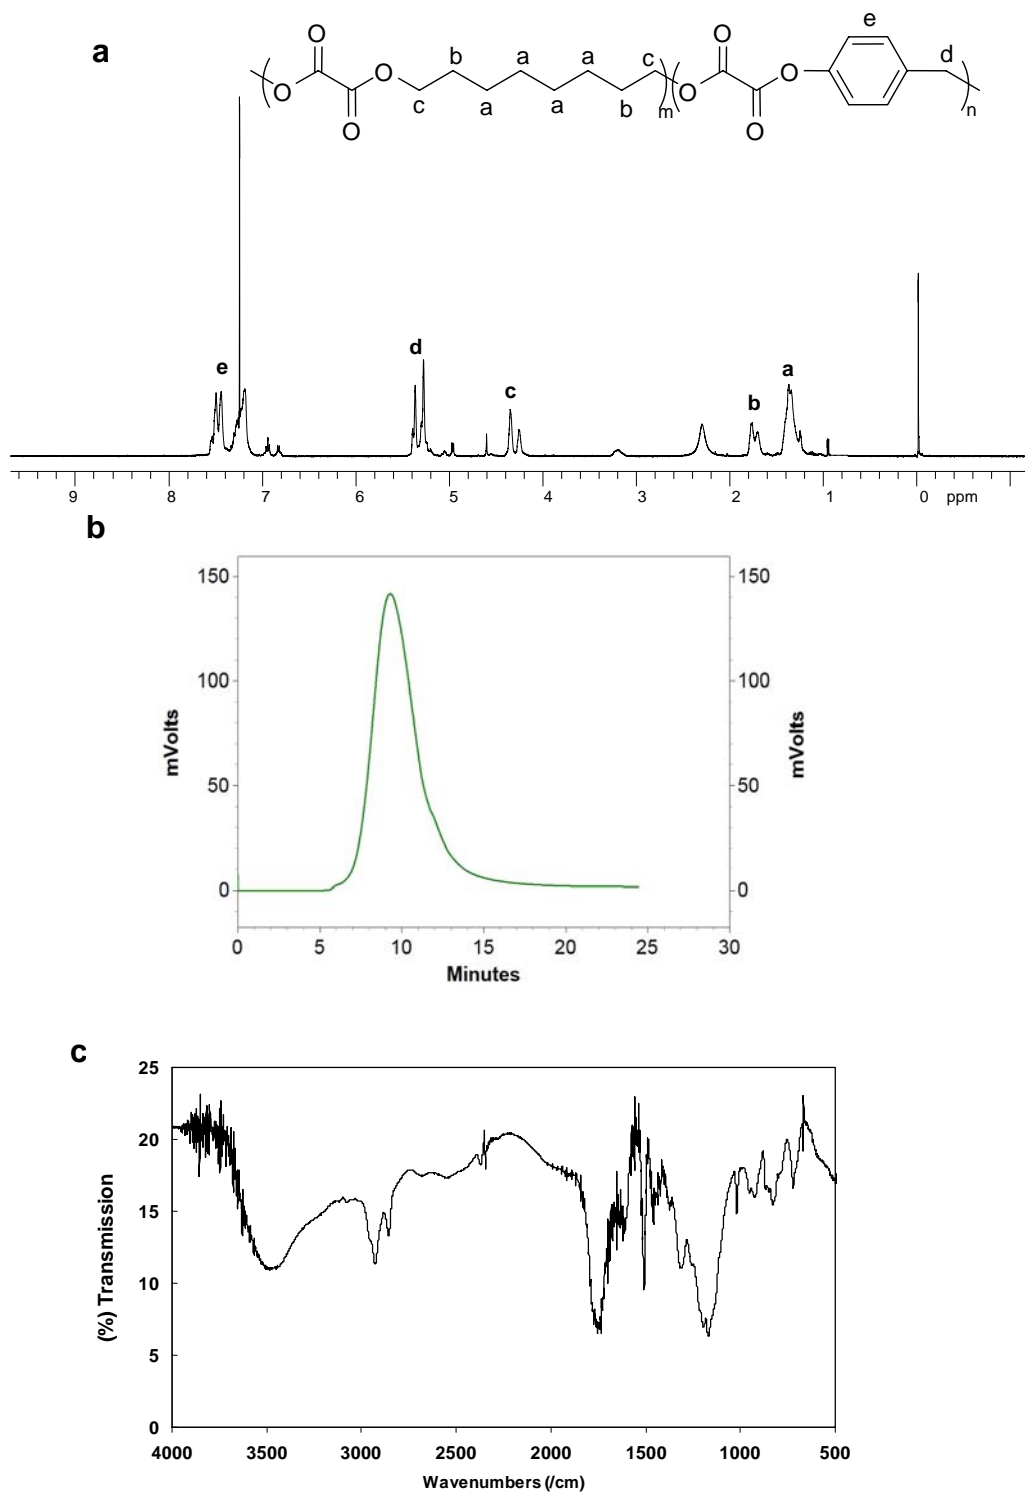

**Figure 2S. Characterization of polymer 1. (a) <sup>1</sup>H-NMR-spectrum, (b) GPC chromatogram, (c) FT-IR spectrum.** The H-NMR spectrum of polymer 1 was measured on a 500MHz spectrometer (Bruker) using deuterated chloroform as the solvent. GPC was measured with a Shimadzu SCL-10A using polystyrene standards. The prominent bands at 1200 and 1750 cm<sup>-1</sup>, on the FT-IR spectrum, correspond to the C-O and C=O stretches of the peroxalate ester, respectively. The C-H stretch appears at 2900 cm<sup>-1</sup>.

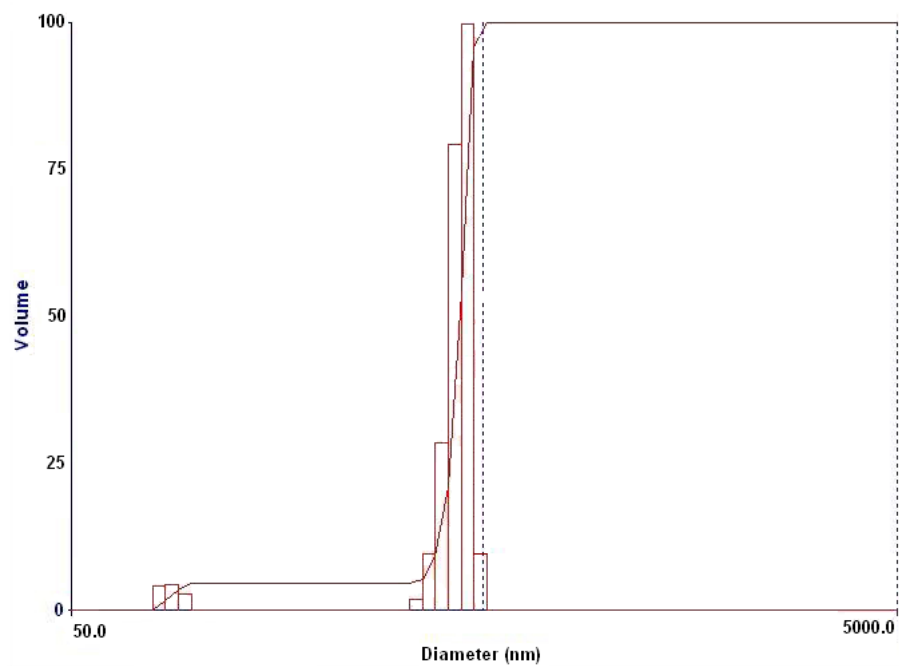

**Figure 3S. Dynamic light scattering of rubrene-encapsulated peroxalate nanoparticles.** DLS samples were measured at a concentration of 0.25mg/mL in pH 7.4 PBS buffer with a Brookhaven 90Plus particle sizer.

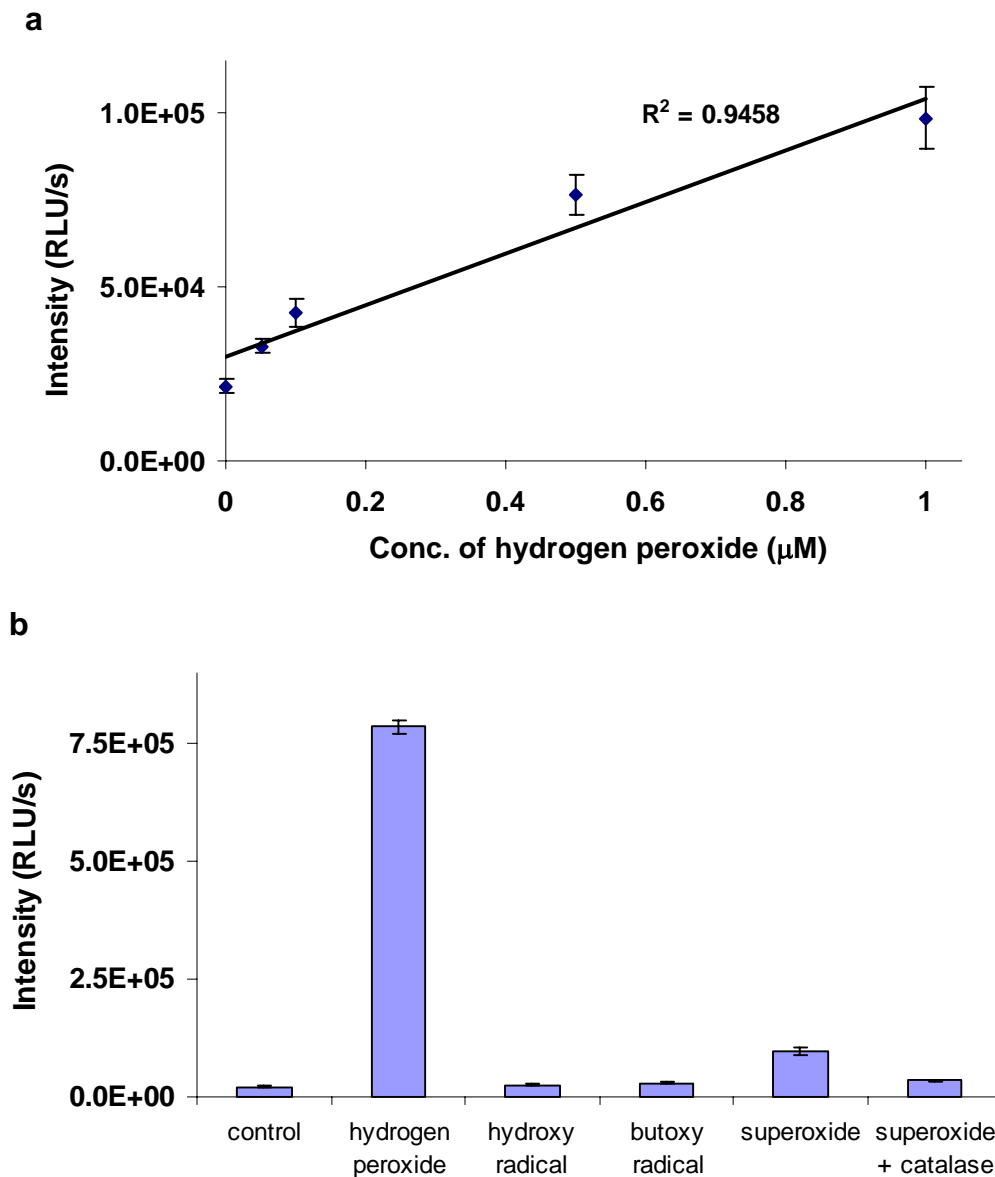

**Figure 4S. Sensitivity and selectivity of pentacene containing peroxalate nanoparticles.** (a). Chemiluminescence intensity of pentacene containing peroxalate nanoparticles at a concentration of hydrogen peroxide  $< 1\mu\text{M}$ . (b) Chemiluminescence response of nanoparticles (1 mg/mL) to various reactive oxygen species. Superoxide was added as solid  $\text{KO}_2$ . Hydroxyl radical and butoxy radical were generated by the reaction of 10 mM of  $\text{Fe}^{2+}$  with 1 mM hydrogen peroxide or 1 mM *tert*-butyl hydroperoxide.

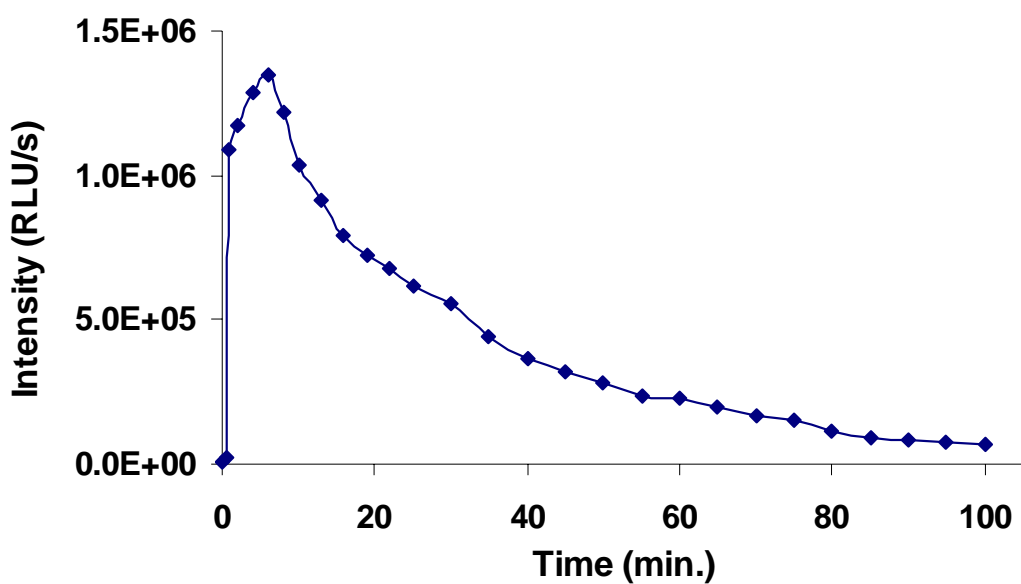

Figure 5S. Kinetics of chemiluminescence from peroxalate nanoparticles containing rubrene in the presence of 10  $\mu\text{M}$  of hydrogen peroxide.
